# Supplementary material
Source: PubMed Central journal article supplement (PMC7050362)
Supplement: NIHMS1550437-supplement-1.pdf [file NIHMS1550437-supplement-1.pdf]

## Supporting Information

### **Expression, Purification, and Functional Reconstitution of <sup>19</sup>F-labeled Cytochrome b5 in Peptide Nanodiscs for NMR Studies**

Jia Bai,<sup>a</sup> Jian Wang,<sup>a</sup> Thirupathi Ravula,<sup>a</sup> Sang-Choul Im,<sup>b</sup> G. M. Anantharamaiah,<sup>c</sup> Lucy Waskell<sup>d</sup>  
& Ayyalusamy Ramamoorthy<sup>a\*</sup>

<sup>a</sup>Biophysics Program, Department of Chemistry, Biomedical Engineering, Macromolecular Science and Engineering, The University of Michigan, Ann Arbor, MI 48109-1055, USA.

<sup>b</sup>Department of Internal Medicine, The University of Michigan, and VA Medical Center, Ann Arbor, Michigan 48105, USA.

<sup>c</sup>Department of Medicine, UAB Medical Center, Birmingham, Alabama, 35294, USA.

<sup>d</sup>Department of Anesthesiology, The University of Michigan, and VA Medical Center, Ann Arbor, Michigan 48105, USA.

\*Corresponding Author: Email: ramamoor@umich.edu

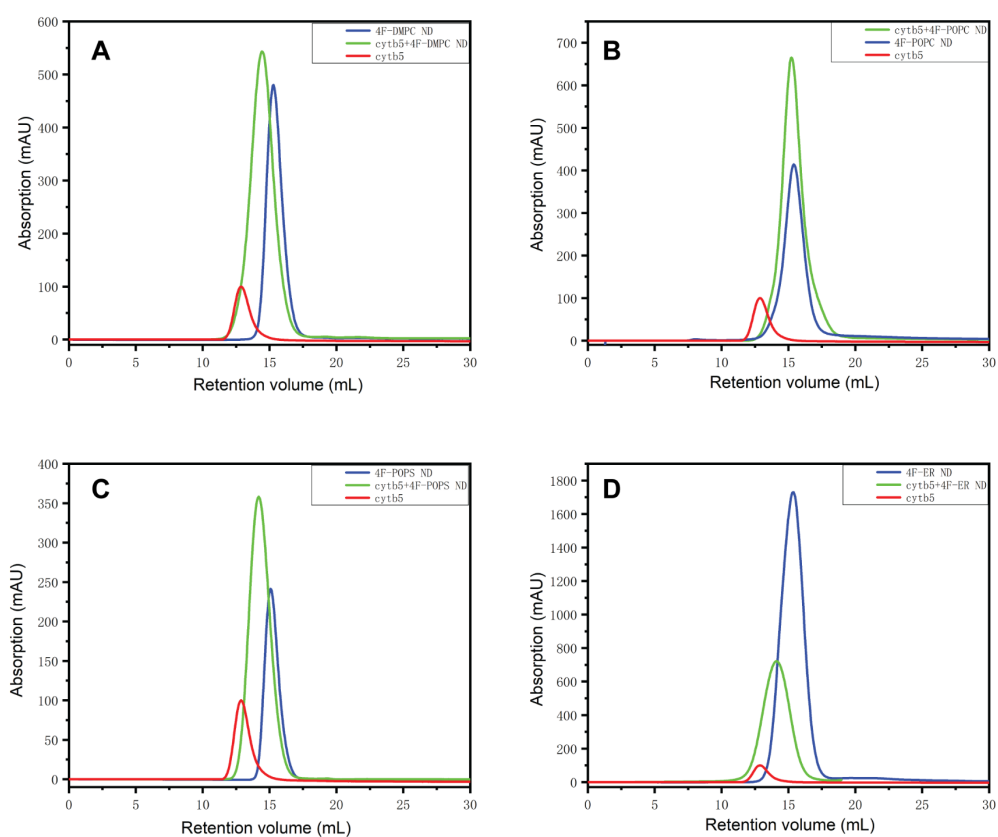

**Figure S1.** SEC elution profiles (A: DMPC, B: POPC, C:POPS, D:ER) of cytb5 alone in buffer (red), empty nanodiscs (blue), and nanodiscs containing cytb5 (green). The normalized intensity profiles are included in the Figure 4 of the main manuscript.
